# Supplementary material for: Lateral Gene Transfer Drives Metabolic Flexibility in the Anaerobic Methane-Oxidizing Archaeal Family Methanoperedenaceae
Source: PubMed Central journal article supplement (PMC7327174; doi:10.1128/mbio.01325-20), 2020-06-30
Supplement: mBio.01325-20-sf001.pdf [file mBio.01325-20-sf001.pdf]

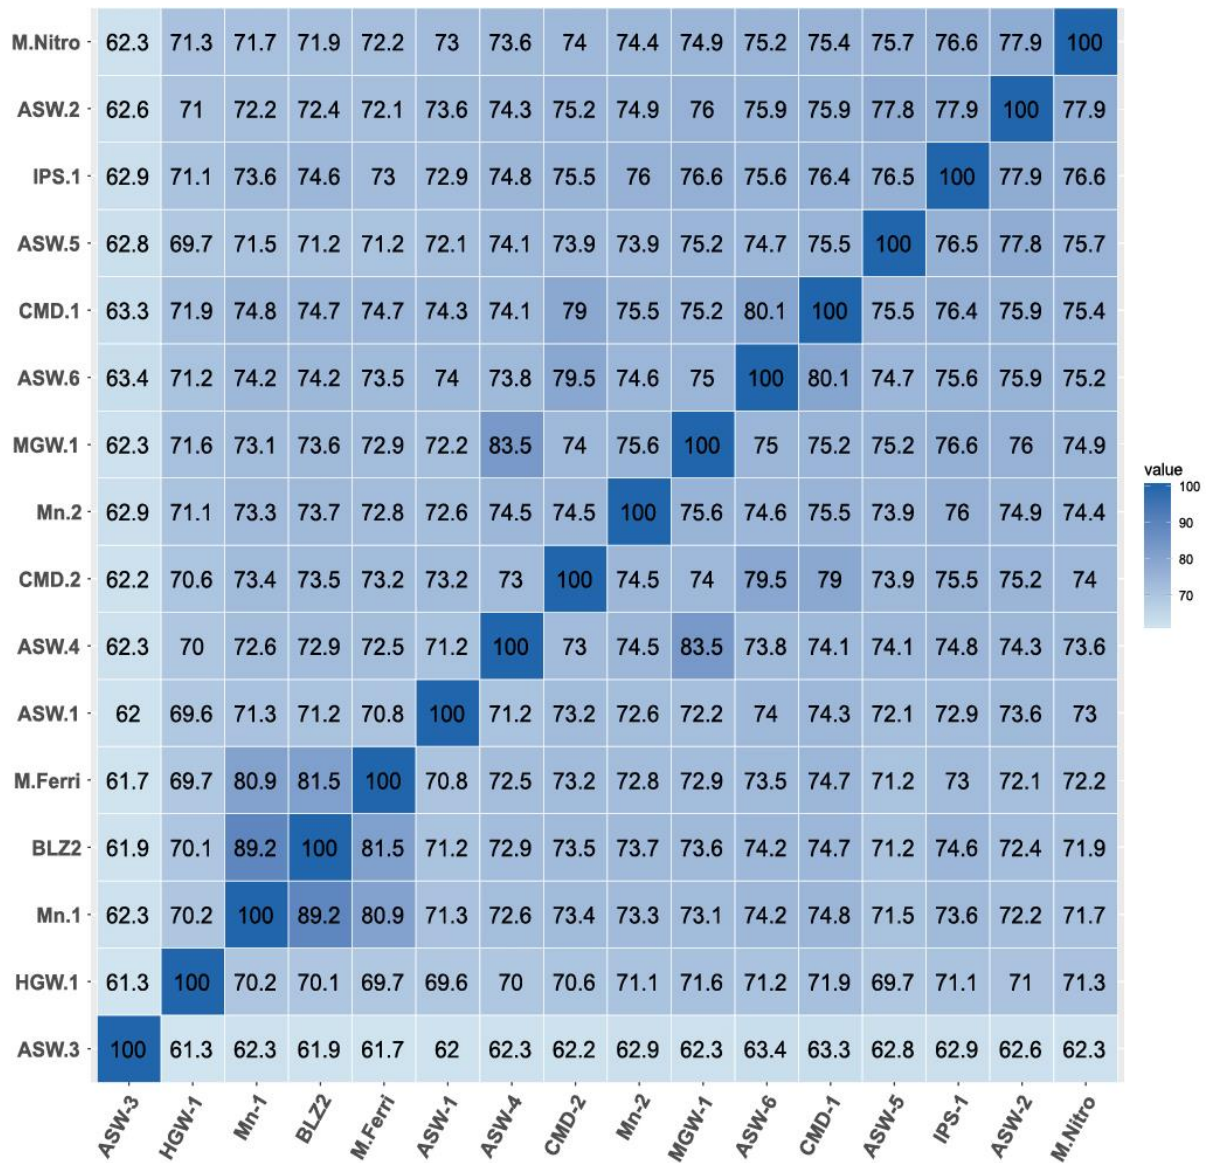

**Figure S1. Average amino acid identity (AAI%) for the *Methanoperedenaceae* genomes.** AAI was calculated between each pair of genomes using CompareM.
