# Supplementary material for: Lateral Gene Transfer Drives Metabolic Flexibility in the Anaerobic Methane-Oxidizing Archaeal Family Methanoperedenaceae
Source: PubMed Central journal article supplement (PMC7327174; doi:10.1128/mbio.01325-20), 2020-06-30
Supplement: mBio.01325-20-sf002.pdf [file mBio.01325-20-sf002.pdf]

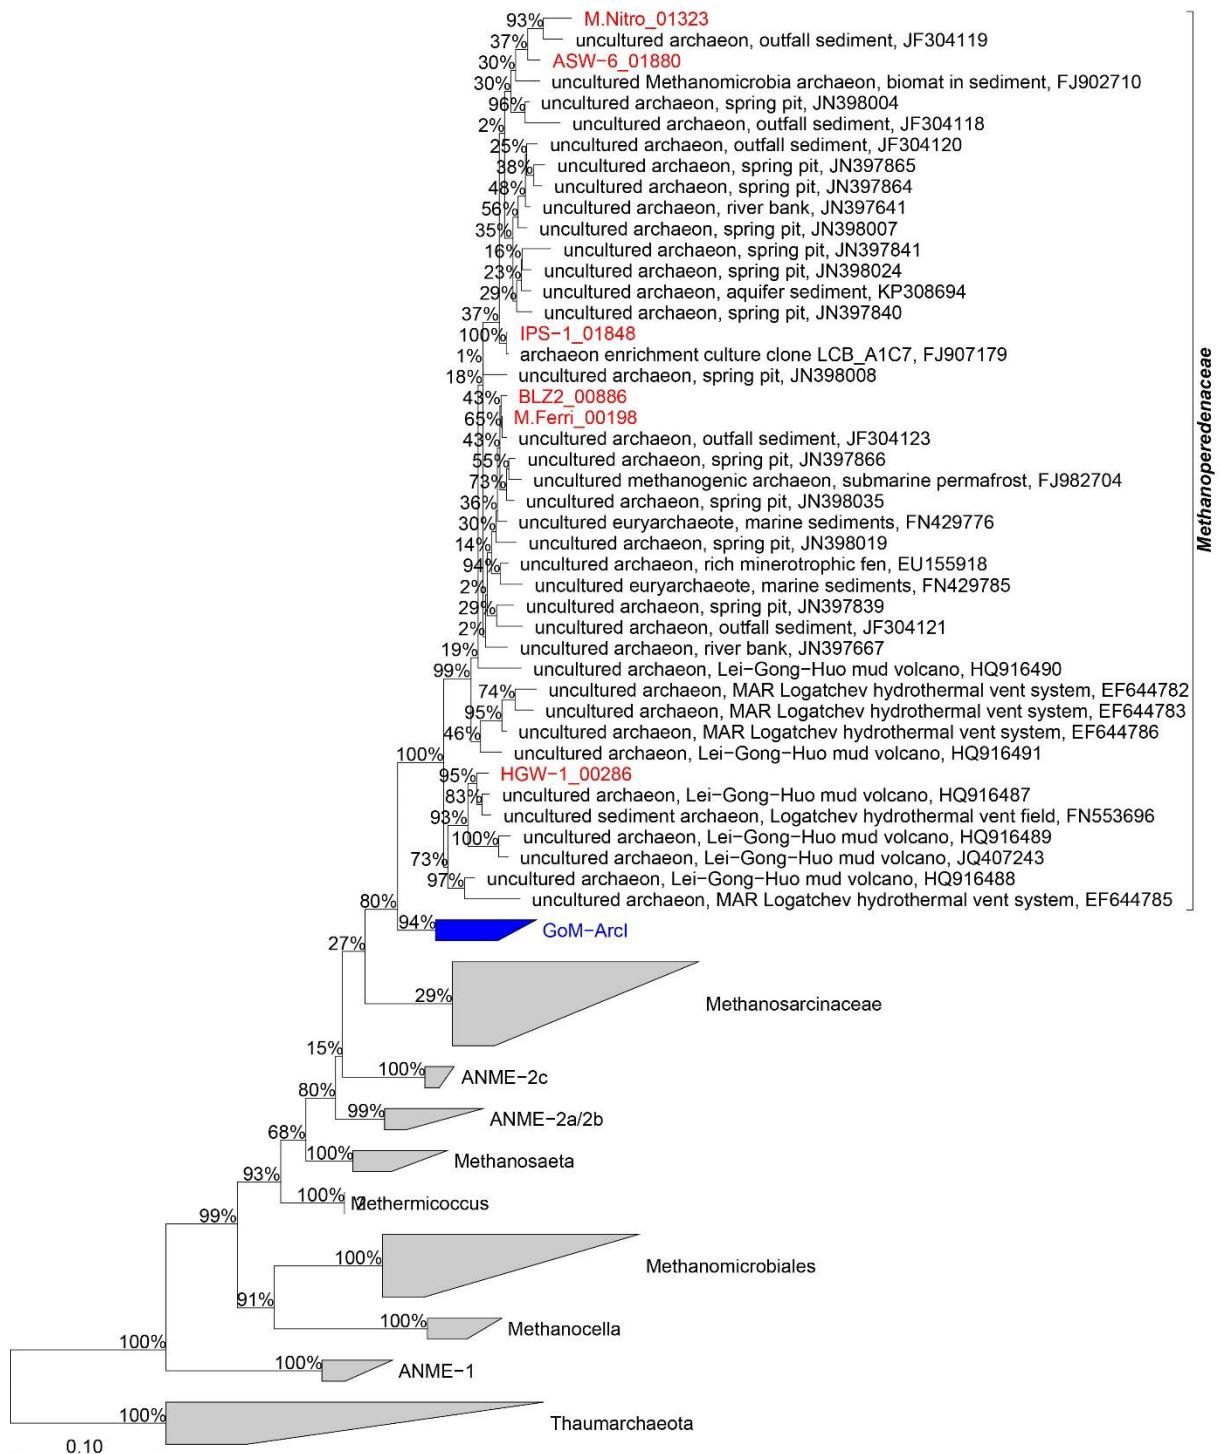

**Figure S2. 16S rRNA gene based phylogenetic placement of the *Methanoperedenaceae* MAGs.** The 16S rRNA genes extracted from the *Methanoperedenaceae* MAGs from this study are highlighted in red. Support values calculated via non-parametric bootstrapping. The scale bar represents changes per nucleotide position.
