# Supplementary material for: Lateral Gene Transfer Drives Metabolic Flexibility in the Anaerobic Methane-Oxidizing Archaeal Family Methanoperedenaceae
Source: PubMed Central journal article supplement (PMC7327174; doi:10.1128/mbio.01325-20), 2020-06-30
Supplement: mBio.01325-20-sf003.pdf [file mBio.01325-20-sf003.pdf]

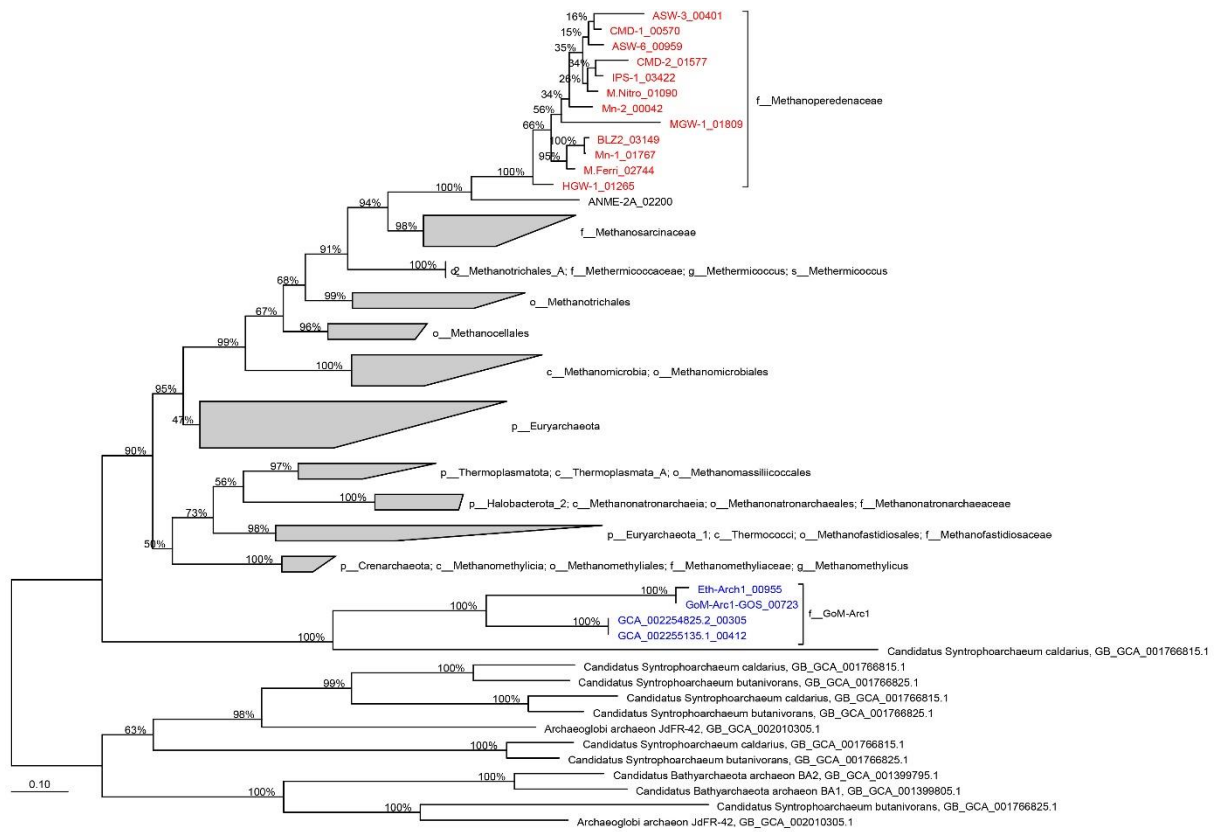

**Figure S3. Phylogenetic analysis of methyl-coenzyme reductase subunit A (McrA).** Putative genes recovered from the *Methanoperedenaceae* are highlighted in red. The gene tree was inferred using maximum likelihood and support values calculated via non-parametric bootstrapping. The scale bar represents amino acid changes.
