# Supplementary material for: Lateral Gene Transfer Drives Metabolic Flexibility in the Anaerobic Methane-Oxidizing Archaeal Family Methanoperedenaceae
Source: PubMed Central journal article supplement (PMC7327174; doi:10.1128/mbio.01325-20), 2020-06-30
Supplement: mBio.01325-20-sf007.pdf [file mBio.01325-20-sf007.pdf]

A.

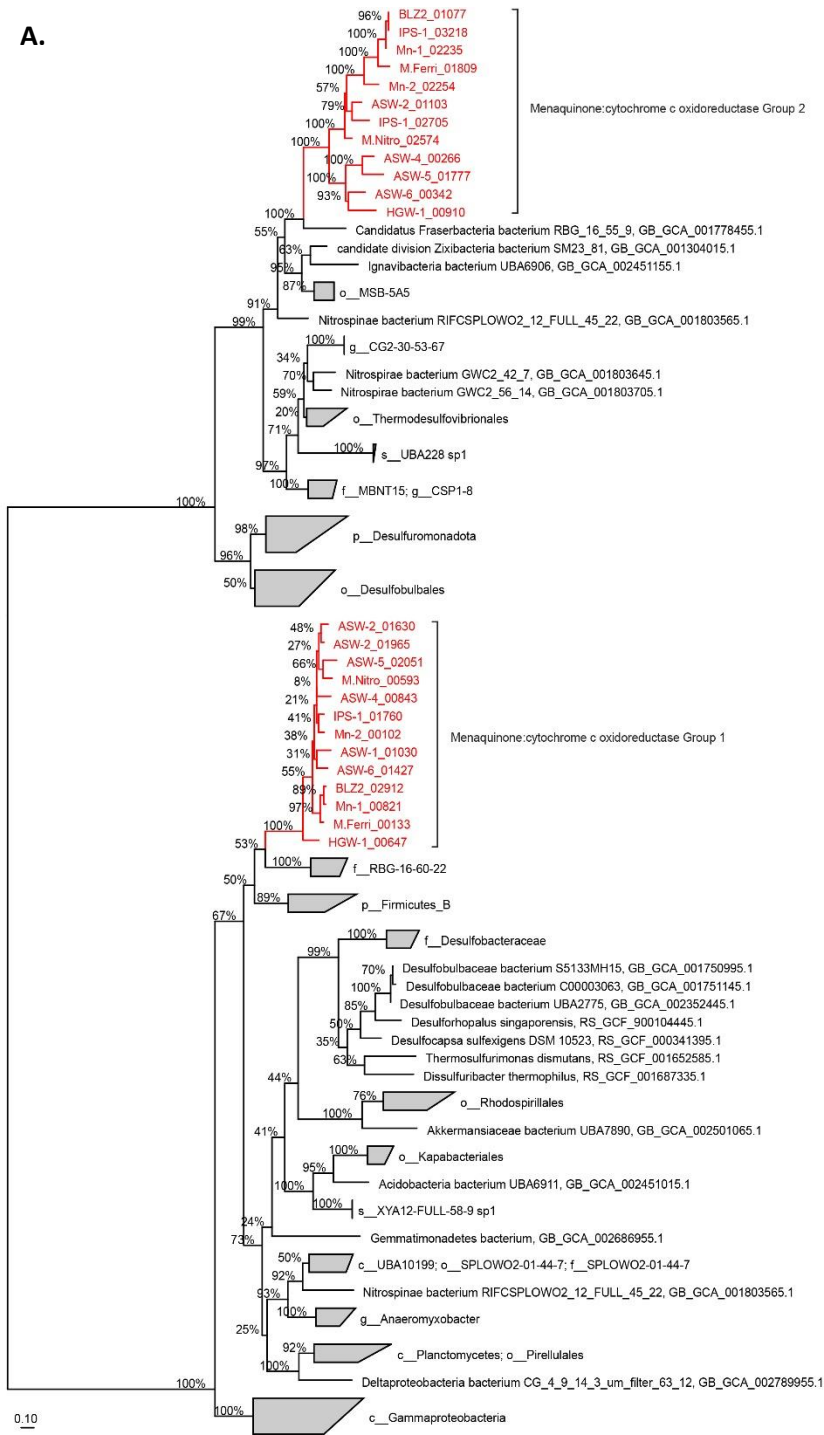

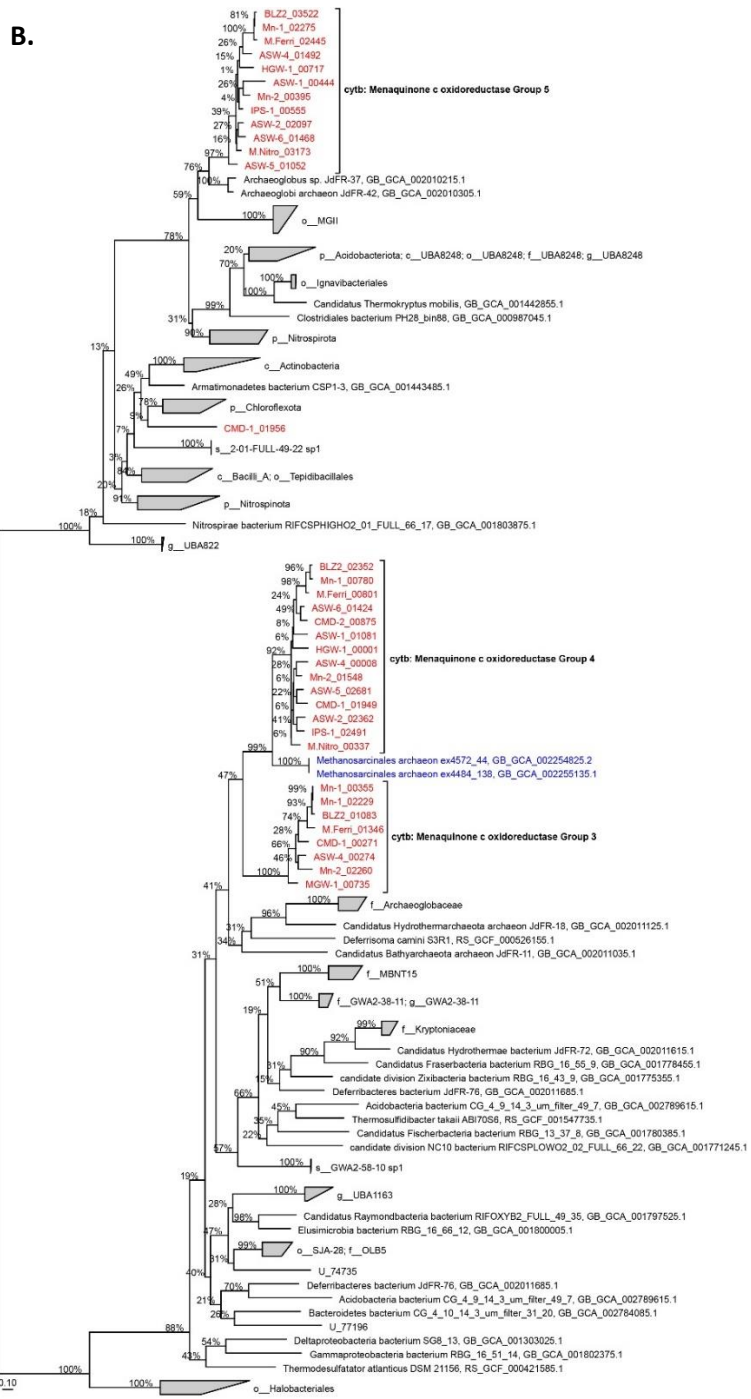

**Figure S7. Phylogenetic analysis of the subunits of the MK:cytochrome oxidoreductases annotated in the *Methanoperedenaceae* MAGs. A. Analysis of the NrfD subunits. B.**

Analysis of the b-type cytochromes. Bootstrap values for the maximum-likelihood trees were determined using non-parametric bootstrapping with 100 replicates. The scale bars represents amino acid changes.
